# Supplementary material
Source: publisher figshare collection journal article supplement (https://sage.figshare.com/ndownloader/files/24789555)
Supplement: Supplementary file 1 [file 24789555]

Reviewer 3

Thank you for the comments and suggestions.

General comments

1. A lot of repetition from the 2017 article on the IFSS. Need a stronger distinction between the

original paper and this one. This has been addressed.

2. The title does not really tell me what this article is about. It is confusing, “adding a qualitative

dimension to the development of the IFSS”. After reading the article, I still don’t know what this

means. What is the qualitative dimension…state it clearly. The title has been changed

3. There are lot of components to this chapter, so it is important to be well organized and

articulate with each piece. Although at times, I felt I was lost when reading this manuscript.

The manuscript has been re-structured

4. Biggest issue I have with this manuscript is the fact that gender and age differences does not

feel like an emphasis, yet in objective it spells out that the article is about “examining the

influence of age and gender on scene preference….”. There are very few substantive findings on

gender and age differences regarding the content of the images. Gender and age have been removed from the main body of this report. They are mentioned in the background section as contextual information about the overall mixed-methods study of which the qualitative study was a component.

5. “However, the existing literature provides no clear guidance to what nature scenes provide

optimal therapeutic benefit.” Some literature gives recommendations about landscapes and

scenes that have therapeutic potential, for example: this has been reworded for clarity. i.e. “However, research about the health benefits of contact with nature is diverse, spanning the disciplines of landscape aesthetics, urban planning, medicine, and environmental psychology, (Bratman, Hamilton, & Daily, 2012) and offers no integrated system for identifying which nature scene are most suitable for therapeutic use in indoor settings”

a. Appleton’s work

b. Ellen Vincent’s work

https://journals.sagepub.com/doi/abs/10.1177/193758671000300306?journalCode=he

ra

c. Claire Cooper Markus and Naomi Sach’s work https://www.wiley.com/enus/

Therapeutic+Landscapes%3A+An+Evidence+Based+Approach+to+Designing+Healing

+Gardens+and+Restorative+Outdoor+Spaces-p-9781118231913

References to (a) and (c) have been included.

6. Some concepts are not clear how they are related to each other:

Structural organization, complexity, preference, socio-demographics (age and gender) an appendix has been added to define structural organisation and complexity. Age and gender have been removed from this report.

7. Include significant references in the bibliography. For example, Appleton. References have been added.

8. Some of the sentences (and sections) are unclear as written. Some also feel overly generic.

 The results section – clearly state results rather than being vague and ambiguous. The results section has been re-written

 Conclusion section – also feels overly general. This section has been rewritten.

 Implications for practice – what can the practitioner take away from this study? Any

specific recommendations for selecting photos that are responsive to gender or age

classifications? An implications for practice paragraph has been added. Age and gender have been removed as a focus of the report.

 Bottom of page 5 is wordy and unclear. This discussion is confusing. Which

sentences relate to the original study, the existing study, and reference to another

study. This section has been re-written for clarity.

 Page 6. “further evaluate and refine the IFSS” in what way? elaborate on specifics. Aims for evaluating the IFSS have been specified in the Objectives section. Refinement of the IFSS is discussed in the conclusions and recommendations section.

For example, how does gender and age influence perceptions related to water, etc.?Gender and age have been removed as a focus of the report.

 Image selection process is confusing as written. Clearly state in the beginning the

criteria for selecting the images and why each criterion is important and how the

authors went about achieving a balance across conflicting criteria (IFS, structural

composition, design complexity, presence of water, sub-scores of the IFSS, diversity

of images). A more detailed description of the image selection process has been added. Even more important is how do these criteria relate to gender and age? Gender and age have been removed from the manuscript.

o Also, who are tertiary-educated artists? I don’t understand this question, however, assume that a definition of tertiary-level education is required. It has been changed to college-level art training.

o How does the Q-sort relate to the levels of IFS? This has been addressed in the paragraph in the materials section headed “preference”

 Under the Methods section, the Design section seems vague. Elaborate on what

type of a mixed-method study. Design section has been revised. What kind of quantitative and qualitative components This is specified under the heading “design” in the methods section. and what specific data were used for this study? This is explained under the heading “qualitative data” in the materials section. Do both qual and quant components relate to gender and age and if so how? Gender and age have been removed from this report. Does this paper cover both or only focus on the qualitative component? This is not clear. Need to clearly

state the study model, the constructs, themes and/or measures studied and how

they relate to each other. Nature Scene content, IFS levels, Preference, Restoration

Potential, the Depression Anxiety Stress Scale, Socio-demographics, etc. The manuscript has been largely re-written to address these issues.

 Text on page 10 is confusing, sentences are choppy and do not flow. The discussion

on the qualitative procedure is not clear. Why are there two image sets (Image set A

and B) and what is the difference between Data Set A and Image Set A. The reader

must work too hard to understand this chapter. You need to make it easy for the

reader to understand. Reference to Data Set A and B has been removed. Image sets A and B have been more carefully described under the heading “Image sets A and B”

 Page 11 needs further development too – “data analysis” Which quantitative data

are you referring too? People who read this article may not have read the 2017

article. Why are you discussing the quantitative data? Not clear. Reference to quantitative data has been removed from the data analysis section.

 Page 11. A lot of listing out the results (e.g. specifics about figure numbers), but

what do these mean particularly related gender and age. The study regarding gender and age has been removed from this report. What are the high-level

findings? There needs to be a hierarchical thought process in the way the

information is presented. What is most important and what is less important?

 Page 14. “it is noted that for some participants, least-preferred images elicited a

relaxed/positive mood state.” Why? This statement has been qualified in the reviewed manuscript.

 Page 15. Some interesting findings on gender and age. Where are the tables and

evidence to support these conclusions? It would be great to see the findings

stratified by gender and age. There is a very small portion of the article devoted to

gender and age. Seems that “Preference and IFFS” have more emphasis in this

paper, but I thought the paper is supposed to be about gender and age based on the

title and objectives. Again, this is an interesting discussion, but I thought the paper

was about gender and age differences. Gender and age have been removed from this report.

 How do you disentangle temporal conditions in nature scenes (such as “disliked

weather”) and landscape elements and features? Viewing landscape scene images captured at a moment in time are the focus of this study, rather than viewing actual landscapes across time, and therefore I did not consider it necessary to disentangle conditions and elements that may change across time.

 What does the number represent in table 1? This has been clarified in the table, and in the results section. How did you come up with the two age groupings? Is this the cumulative ranking? Age has been removed from the body of this report.

 Tables 4 and 5 are nice, but is there any classification by gender or age? N/A

 Why were the nature scenes rated differently by gender or age? This is not clear. I

want to know more than just which images were rated in a certain way. What

higher level conclusions can you draw from a synthesis of all of the findings? N/A

 33 – 46 what are these images for?

 Page 47 – how did you operationalize and evaluate the “Structural Design” of nature

scenes? (also, Typo – 3. Clutterloorganization). Did you reference Kaplan’s work, for

example, 1972? Appendix B presents operational definitions for structural design and complexity.

 Low level IFS to high level IFS. This needs to be clearly defined/explained at the

beginning or the reader will be lost. Go beyond what it is and state why this is

important and how you operationalized these levels. Then talk about how you

quantified the construct of IFS as depicted in nature scenes in the previous study

(IFSS). These issues are addressed in the revised manuscript, in the background section under the heading “The importance for survival scale” and in the Materials section under the heading Photographs of Nature Scenes Then how this study adds to this understanding. This is covered in the revised objectives section.

 Important citations that are referenced should be in the references.

Psycho-evolutionary construct – Importance for Survival (IFS) – basis for

selecting generally preferred nature scenes and provide potential for

restoration. (stems from Darwin’s evolutionary theory, Appleton’s prospect

refuge theory and Ulrich’s psycho-evolutionary theory) Please see revision in the Background section under the heading “The Importance for Survival Scale”.

Again, I thank you for your guidance.
